# Supplementary material
Source: publisher figshare collection journal article supplement (https://sage.figshare.com/ndownloader/files/17905190)
Supplement: Supplementary file 1 [file 17905190]

## Appendix 2. Characteristics of study population among patients with the four most common cancers by age group

|                                    | Total     |         |           |            |                       | Age 18-64 Years |         |          |            |                       | Age ≥ 65 Years |         |           |            |                       |
|------------------------------------|-----------|---------|-----------|------------|-----------------------|-----------------|---------|----------|------------|-----------------------|----------------|---------|-----------|------------|-----------------------|
|                                    | Breast    | Lung    | Prostate  | Colorectal |                       | Breast          | Lung    | Prostate | Colorectal |                       | Breast         | Lung    | Prostate  | Colorectal |                       |
| n= sample size                     | 985       | 201     | 726       | 299        |                       | 511             | 71      | 168      | 130        |                       | 474            | 130     | 558       | 169        |                       |
| N= population size                 | 2,258,403 | 459,545 | 1,734,866 | 597,870    | <i>P</i> <sup>a</sup> | 1,078,239       | 150,515 | 417,855  | 249,297    | <i>P</i> <sup>a</sup> | 1,180,164      | 308,999 | 1,317,011 | 248,573    | <i>P</i> <sup>a</sup> |
| Age                                |           |         |           |            |                       |                 |         |          |            |                       |                |         |           |            |                       |
| Total (mean)                       | 65.0      | 67.6    | 70.9      | 67.4       | < .001                | 54.6            | 54.9    | 56.8     | 53.9       | < .001                | 74.5           | 73.8    | 75.3      | 77.1       | < .001                |
| 18-39 (%)                          | 2.5       | 1.6     | 0.8       | 3.5        | < .001                | 5.3             | 4.9     | 3.3      | 8.3        | 0.679                 |                |         |           |            |                       |
| 40-64 (%)                          | 45.2      | 31.2    | 23.3      | 38.2       |                       | 94.7            | 95.1    | 96.7     | 91.7       |                       |                |         |           |            |                       |
| 65+ (%)                            | 52.3      | 67.2    | 75.9      | 58.3       |                       |                 |         |          |            |                       | 100.0          | 100.0   | 100.0     | 100.0      |                       |
| Sex (%)                            |           |         |           |            | < .001                |                 |         |          |            | < .001                |                |         |           |            | < .001                |
| Men                                | 0.2       | 48.6    | 100.0     | 55.2       |                       | 0.2             | 46.3    | 100.0    | 52.2       |                       | 0.2            | 49.7    | 100.0     | 57.3       |                       |
| Women                              | 99.8      | 51.5    | 0.0       | 44.9       |                       | 99.8            | 53.7    | 0.0      | 47.8       |                       | 99.8           | 50.3    |           | 42.7       |                       |
| Race/ethnicity (%)                 |           |         |           |            | < .01                 |                 |         |          |            | 0.141                 |                |         |           |            | < .05                 |
| White, non-Hispanic                | 79.3      | 84.7    | 79.3      | 74.3       |                       | 71.5            | 80.3    | 79.2     | 68.6       |                       | 86.4           | 86.9    | 79.4      | 78.3       |                       |
| Black, non-Hispanic                | 9.8       | 10.9    | 13.5      | 10.6       |                       | 12.2            | 12.4    | 13.4     | 11.5       |                       | 7.7            | 10.2    | 13.5      | 9.9        |                       |
| Hispanic                           | 7.1       | 2.9     | 4.9       | 10.7       |                       | 11.3            | 5.9     | 4.5      | 13.9       |                       | 3.4            | 1.5     | 5.0       | 8.5        |                       |
| Other, non-Hispanic                | 3.8       | 1.4     | 2.3       | 4.4        |                       | 5.0             | 1.4     | 2.9      | 6.0        |                       | 2.6            | 1.4     | 2.1       | 3.3        |                       |
| Married (%)                        | 55.1      | 53.7    | 67.7      | 49.6       | < .001                | 67.5            | 60.6    | 67.9     | 49.8       | 0.091                 | 43.7           | 50.4    | 67.6      | 49.4       | < .001                |
| Education (%) <sup>b</sup>         |           |         |           |            | < .001                |                 |         |          |            | 0.068                 |                |         |           |            | < .01                 |
| < High School                      | 6.9       | 18.2    | 8.5       | 14.5       |                       | 5.3             | 14.2    | 5.5      | 11.4       |                       | 8.4            | 20.3    | 9.4       | 16.9       |                       |
| High School graduate               | 37.1      | 45.4    | 30.4      | 38.1       |                       | 31.1            | 43.1    | 25.3     | 35.1       |                       | 42.8           | 46.7    | 32.1      | 40.4       |                       |
| Some college or more               | 56.0      | 36.4    | 61.2      | 47.4       |                       | 63.7            | 42.7    | 69.2     | 53.5       |                       | 48.8           | 33.0    | 58.5      | 42.7       |                       |
| Poverty status (%) <sup>c</sup>    |           |         |           |            | < .001                |                 |         |          |            | < .001                |                |         |           |            | < .001                |
| Poor/low income                    | 27.7      | 47.5    | 23.8      | 43.0       |                       | 21.0            | 46.6    | 17.1     | 42.6       |                       | 33.7           | 48.1    | 25.9      | 43.2       |                       |
| Middle income                      | 27.8      | 33.3    | 26.6      | 29.7       |                       | 29.3            | 30.9    | 20.2     | 24.0       |                       | 26.4           | 34.4    | 28.7      | 33.8       |                       |
| High income                        | 44.5      | 19.2    | 49.6      | 27.3       |                       | 49.6            | 22.5    | 62.7     | 33.4       |                       | 39.9           | 17.5    | 45.4      | 23.0       |                       |
| No. of chronic conditions (%)      |           |         |           |            | < .05                 |                 |         |          |            | 0.265                 |                |         |           |            | 0.515                 |
| 0                                  | 16.9      | 7.5     | 12.5      | 14.5       |                       | 28.8            | 9.6     | 22.6     | 24.8       |                       | 6.1            | 6.5     | 9.2       | 7.2        |                       |
| 1                                  | 24.0      | 17.0    | 22.8      | 21.3       |                       | 30.0            | 25.5    | 32.3     | 27.3       |                       | 20.4           | 12.8    | 19.8      | 16.9       |                       |
| ≥2                                 | 58.1      | 75.5    | 64.7      | 64.2       |                       | 41.2            | 64.9    | 45.1     | 47.8       |                       | 73.5           | 80.7    | 71.0      | 75.9       |                       |
| Health insurance (%)               |           |         |           |            | < .001                |                 |         |          |            | < .01                 |                |         |           |            | < .01                 |
| Any private                        | 71.6      | 47.3    | 66.1      | 54.0       |                       | 81.2            | 63.2    | 80.8     | 61.0       |                       | 62.9           | 39.5    | 61.5      | 49.0       |                       |
| Public only                        | 27.1      | 48.4    | 32.9      | 41.6       |                       | 16.2            | 23.6    | 15.2     | 28.4       |                       | 37.1           | 60.5    | 38.5      | 51.0       |                       |
| Uninsured                          | 1.3       | 4.3     | 1.0       | 4.4        |                       | 2.6             | 13.2    | 3.9      | 10.6       |                       | 0.0            | 0.0     | 0.0       | 0.0        |                       |
| Age ≥ 65 years                     |           |         |           |            |                       |                 |         |          |            |                       |                |         |           |            | < .01                 |
| Medicare only                      |           |         |           |            |                       |                 |         |          |            |                       | 29.0           | 39.0    | 33.7      | 36.7       |                       |
| Medicare and private               |           |         |           |            |                       |                 |         |          |            |                       | 61.2           | 39.5    | 60.1      | 49.0       |                       |
| Medicare and public                |           |         |           |            |                       |                 |         |          |            |                       | 8.1            | 21.5    | 4.8       | 14.4       |                       |
| No Medicare and any private/public |           |         |           |            |                       |                 |         |          |            |                       | 1.7            | 0.0     | 1.4       | 0.0        |                       |

<sup>a</sup>P-values reflect ANOVA test for differences among patients with breast, lung, prostate, and colorectal cancer.

<sup>b</sup>Missing cases were not included.

<sup>c</sup>Poverty status was constructed by dividing family income by the applicable poverty line based on family size and composition: Poor/low income (less than 200%), middle income (200% to less than 400%), and high income (greater than or equal 400%).
